# Supplementary material for: Glacier Fluctuations in the Northern Patagonian Andes (44°S) Imply Wind-Modulated Interhemispheric in Phase Paleoclimates During Termination 1
Source: Research Square preprint supplement (doi:10.21203/rs.3.rs-1389274/v1), 2022-03-07

SUPPLEMENTARY MATERIAL for: “Glacier fluctuations in the northern Patagonian Andes (44°S) imply wind-modulated interhemispheric in phase paleoclimates during Termination 1” by R.L. Soteres *et al.*

Table 1s. Geographic and 10Be analytical data sorted into moraine complexes with outliers (*). Boron-corrected 10Be/9Be values were measured against the 07KNSTD AMS standard with reported 10Be/9Be value of 2.85x1012 ([50]; 10Be half-life = 1.36 Myr.). 1σ analytical or internal AMS uncertainties are shown. 10Be concentrations are corrected for 10Be in process blanks run with each sample batch. Density = 2.65 g/cm3. Erosion correction = 0 mm/kyr. Carrier concentrations in ppm as follows, with the 10Be/9Be ratios measured in the process blanks in each sample batch: (a) 1031.92; 9.348 x 10-17; (b) 1032; 2.51655 x 10-16; (c) 1037.83; 6.21585 x 10-16; (d) 1029.5; 9.94 x 10-16; (e) 1030; 1.06362 x 10-15.

| ID Sample | Latitude | Longitude | Elev. | Thickness | Shielding | Quartz | 9Be Carrier | 10Be/9Be | 10Be |
| --- | --- | --- | --- | --- | --- | --- | --- | --- | --- |
|  | (DD) | (DD) | (m. asl.) | (cm) |  | (g) | (g) | (10-14) | (104 atoms/g) |
| **PV6** |  |  |  |  |  |  |  |  |  |
| LVM17-19 | -43.95039 | -71.47274 | 966 | 1.5 | 0.99999 | 10.0587 | 0.1827 d | 13.3693 ± 0.2753 | 16.7204 ± 0.3451 |
| LVM17-20 | -43.96147 | -71.48231 | 986 | 1.46 | 0.99999 | 10.0695 | 0.1824 d | 14.9934 ± 0.2778 | 18.7157 ± 0.3475 |
| LVM17-21 | -43.96136 | -71.48222 | 987 | 2.12 | 0.99999 | 10.2666 | 0.1825 d | 14.2141 ± 0.4076 | 17.4056 ± 0.4997 |
| LVM17-23 | -43.95932 | -71.48016 | 988 | 1.73 | 0.99999 | 10.2027 | 0.1828 d | 14.5319 ± 0.4113 | 17.9385 ± 0.5082 |
| **CR1** |  |  |  |  |  |  |  |  |  |
| LV17-15 | -43.95631 | -71.63477 | 989 | 0.83 | 0.99561 | 10.0593 | 0.1810 b | 11.9671 ± 0.2223 | 14.7759 ± 0.2754 |
| LV17-17 | -43.95763 | -71.63805 | 1028 | 0.92 | 0.99436 | 7.3368 | 0.1811 b | 8.4723 ± 0.1780 | 14.3194 ± 0.3024 |
| LV17-18 | -43.95779 | -71.63845 | 1033 | 0.66 | 0.98835 | 8.5175 | 0.1824 a | 11.9671 ± 0.2223 | 14.8313 ± 0.2852 |
| LV17-34 | -43.95681 | -71.63554 | 999 | 1.66 | 0.99431 | 10.0111 | 0.1817 b | 10.0501 ± 0.1932 | 13.8238 ± 0.3937 |
| LV17-35 | -43.95674 | -71.63504 | 991 | 2.03 | 0.99035 | 10.0145 | 0.1804 b | 11.9671 ± 0.2223 | 13.4924 ± 0.3087 |
| LV17-36 | -43.95656 | -71.63422 | 977 | 1.89 | 0.99531 | 10.0420 | 0.1810 b | 10.8833 ± 0.2483 | 14.6171 ± 0.3836 |
| LV17-41 | -43.95595 | -71.63452 | 993 | 1.44 | 0.99553 | 10.0267 | 0.1818 c | 11.4006 ± 0.2171 | 14.1814 ± 0.2710 |
| **CR2** |  |  |  |  |  |  |  |  |  |
| LV17-20 | -43.95951 | -71.64014 | 1057 | 1.49 | 0.99168 | 9.8171 | 0.1806 b | 9.5606 ± 0.2271 | 12.1003 ± 0.2883 |
| LV17-21 | -43.959 | -71.6394 | 1051 | 0.99 | 0.99415 | 10.6714 | 0.1824 b | 11.0940 ± 0.1887 | 13.0509 ± 0.2231 |
| LV17-23 | -43.95738 | -71.63653 | 1016 | 1.47 | 0.99672 | 10.0129 | 0.1817 c | 9.9408 ± 0.1855 | 12.3656 ± 0.2318 |
| LV17-24 | -43.95723 | -71.63578 | 1007 | 1.25 | 0.99564 | 7.7729 | 0.1798 b | 9.5606 ± 0.2271 | 12.3310 ± 0.2849 |
| LV17-25 | -43.95721 | -71.63571 | 1006 | 0.96 | 0.99536 | 10.0773 | 0.1817 c | 7.7533 ± 0.1782 | 11.9031 ± 0.2277 |
| LV17-27 | -43.9569 | -71.63461 | 987 | 1.12 | 0.99631 | 10.5152 | 0.1811 b | 9.7772 ± 0.1833 | 11.5858 ± 0.2183 |
| **CR3** |  |  |  |  |  |  |  |  |  |
| LV17-03 | -43.95847 | -71.63325 | 1000 | 0.98 | 0.99529 | 9.4877 | 0.1823 a | 9.1395 ± 0.1725 | 12.1005 ± 0.2285 |
| LV17-04 | -43.95846 | -71.63338 | 1003 | 1.71 | 0.99529 | 6.3327 | 0.1822 a | 5.8934 ± 0.1295 | 11.6772 ± 0.2569 |
| LV17-05 | -43.95816 | -71.6346 | 997 | 0.91 | 0.9947 | 10.0425 | 0.1818 a | 9.1985 ± 0.2390 | 11.4743 ± 0.2982 |
| LV17-06 | -43.95891 | -71.63708 | 1034 | 0.99 | 0.99307 | 10.0736 | 0.1811 c | 9.5331 ± 0.1876 | 11.7448 ± 0.2321 |
| LV17-07 | -43.95936 | -71.63822 | 1060 | 2.53 | 0.99282 | 7.1468 | 0.1801 b | 6.9884 ± 0.1533 | 12.1040 ± 0.2675 |
| LV17-08 | -43.95942 | -71.63835 | 1066 | 0.99 | 0.99467 | 5.4946 | 0.1823 a | 5.3347 ± 0.1266 | 12.1869 ± 0.2895 |
| LV17-12 | -43.96037 | -71.64056 | 1076 | 1.61 | 0.99337 | 10.3945 | 0.1822 a | 10.0876 ± 0.1887 | 12.1851 ± 0.2281 |
| **CR4** |  |  |  |  |  |  |  |  |  |
| LV17-29 | -43.9607 | -71.63497 | 1017 | 0.83 | 0.98634 | 10.0145 | 0.1825 a | 9.1901 ± 0.1884 | 11.5402 ± 0.2367 |
| LV17-30* | -43.9607 | -71.63545 | 1014 | 1.18 | 0.99355 | 11.0143 | 0.1818 c | 8.3826 ± 0.1910 | 94.735 ± 0.2168 |
| LV17-37 | -43.96248 | -71.63354 | 1030 | 1.36 | 0.98865 | 15.0622 | 0.1818 c | 14.6167 ± 0.2916 | 12.1180 ± 0.2422 |
| **CR5** |  |  |  |  |  |  |  |  |  |
| LV17-38 | -43.9689 | -71.64705 | 1048 | 1 | 0.93103 | 14.0461 | 0.1821 c | 12.9493 ± 0.2468 | 10.7591 ± 0.2056 |
| LV17-39 | -43.9688 | -71.64677 | 1050 | 1.66 | 0.93104 | 12.0197 | 0.1817 e | 10.4793 ± 0.1950 | 10.7913 ± 0.2020 |
| **Perched boulder** |  |  |  |  |  |  |  |  |  |
| LV17-42 | -43.95883 | -71.62435 | 962 | 1.56 | 0.99333 | 10.0267 | 0.1825 c | 11.3490 ± 0.2922 | 14.1715 ± 0.3656 |

Figure 1s. Kernel density diagrams of 10Be for the sequence of moraine ridges at Lago Palena/General Vintter and in the Cerro Riñón valley. Red lines are Gaussian curves of individual ages. Thick black line is the sum of all samples in each moraine ridge. Blue line is the mean age. Yellow bar and green lines represent the 1σ and 2σ uncertainty ranges, respectively. In the text, aritmethic means are shown with 1σ and standard error of the mean (SEM) including 3% propagated production rate uncertainty. Chi square value is shown as R2.


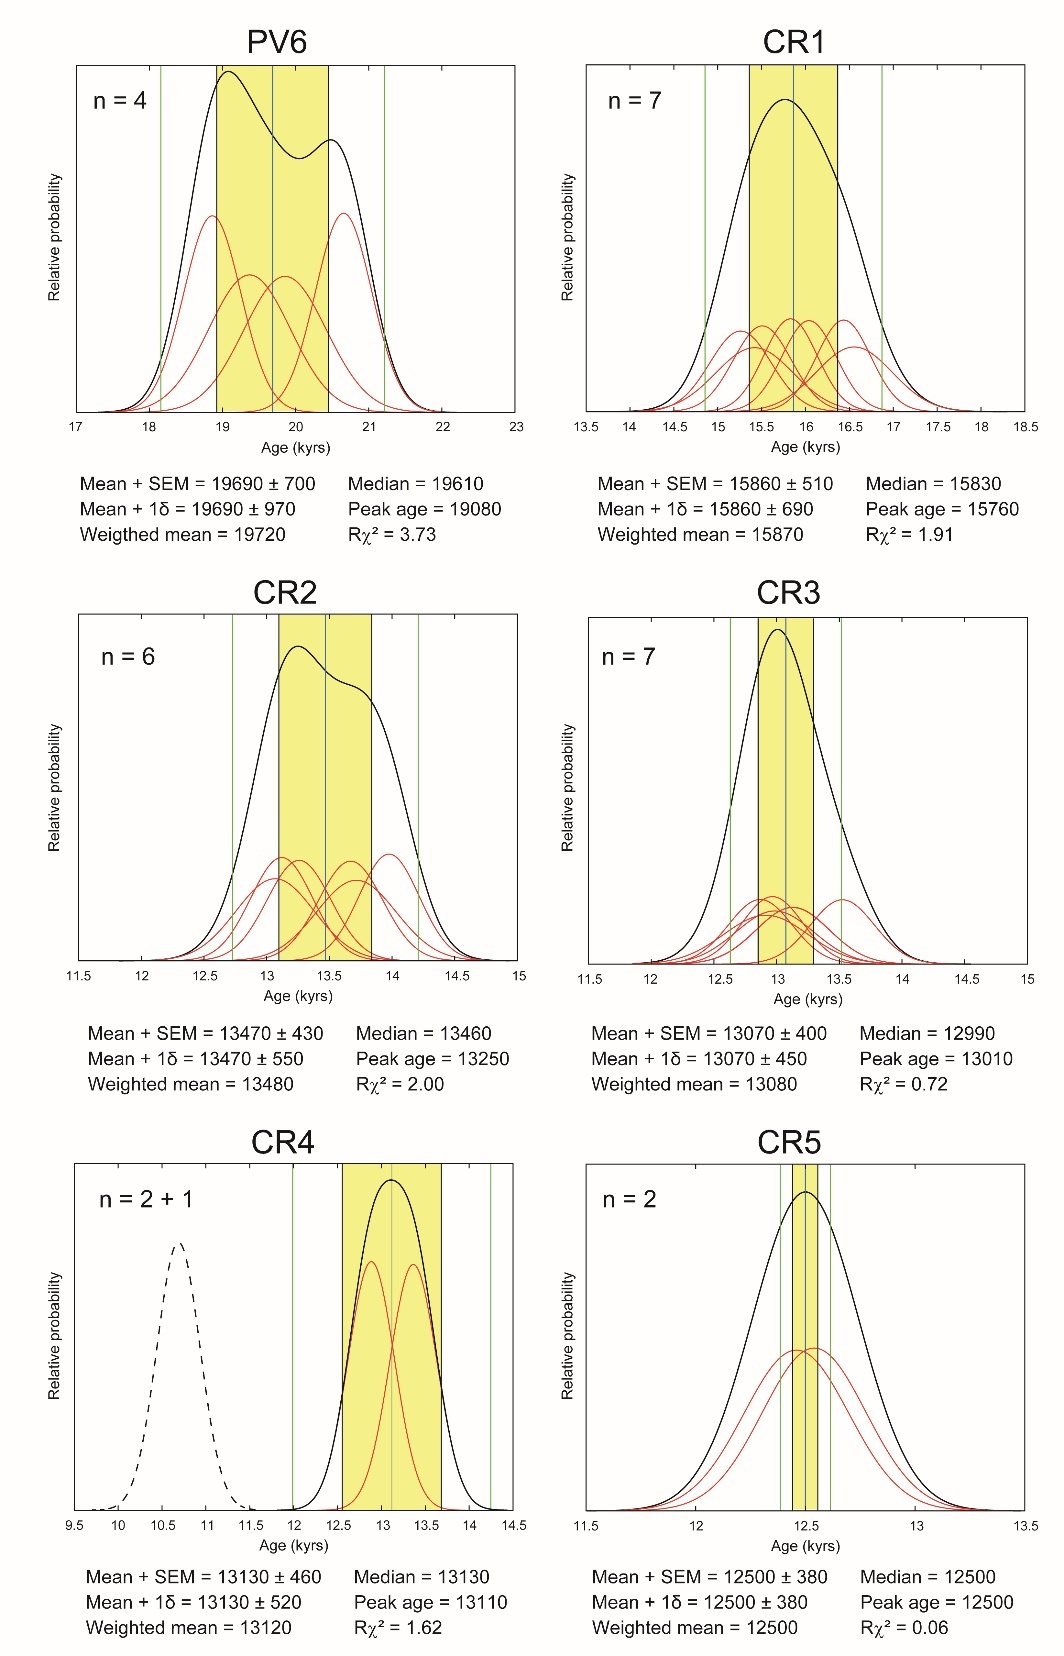


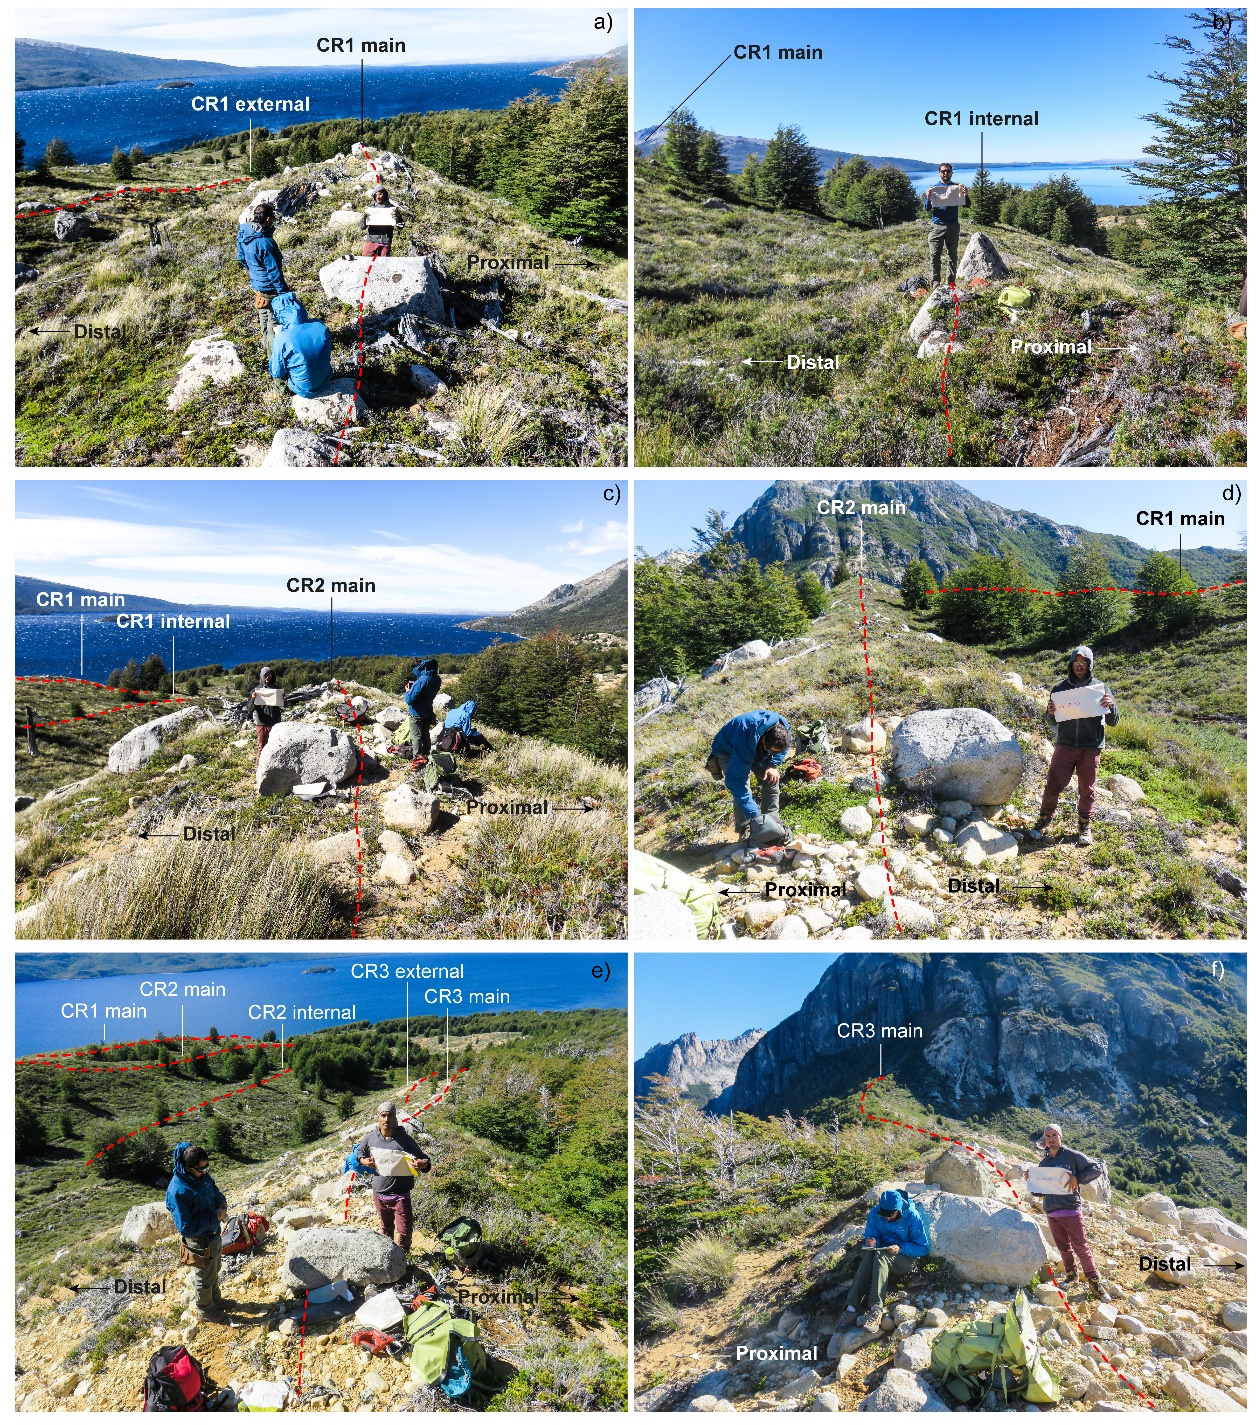
Figure 2s. Overview of the main moraine complexes in the Cerro Riñón valley and examples of boulders sampled for surface exposure dating. a) and b) The CR1 moraine complex; c) and d) The CR2 moraine complex; e) and f) The CR3 moraine complex.

Figure 3s: Globaly distributed glacier chronologies spanning T1. Circles correspond to mean moraine 10Be ages accompanied by ±1σ range. Squares denote 10Be ages from erratics and bedrock outcrops (±1σ ). Triangles are bracketing radiocarbon ages with 2σ calibrated uncertainty. a) Glacier fluctuations in Patagonia [*this study,14,21,22,23,24,25,26]. b) Glacier fluctuations in the Southern Alps of New Zealand [28,29,30,31]. c) Glacier fluctuations in high latitudes of the Northern Hemisphere including Artic Norway [5], Alaska [6], Highland Scotland [7] and south Greenland [44,46]. d) Glacier fluctuations in Western United States [43,45]. e) Glacier fluctuations in the European Alps [40,41,42,47,48,49,50,51]. f) CO2 record from WAIS ice core [38]. Blue bars highlight cold/wet interval and yellow bars demote warm/dry periods inferred from palinological analyses.


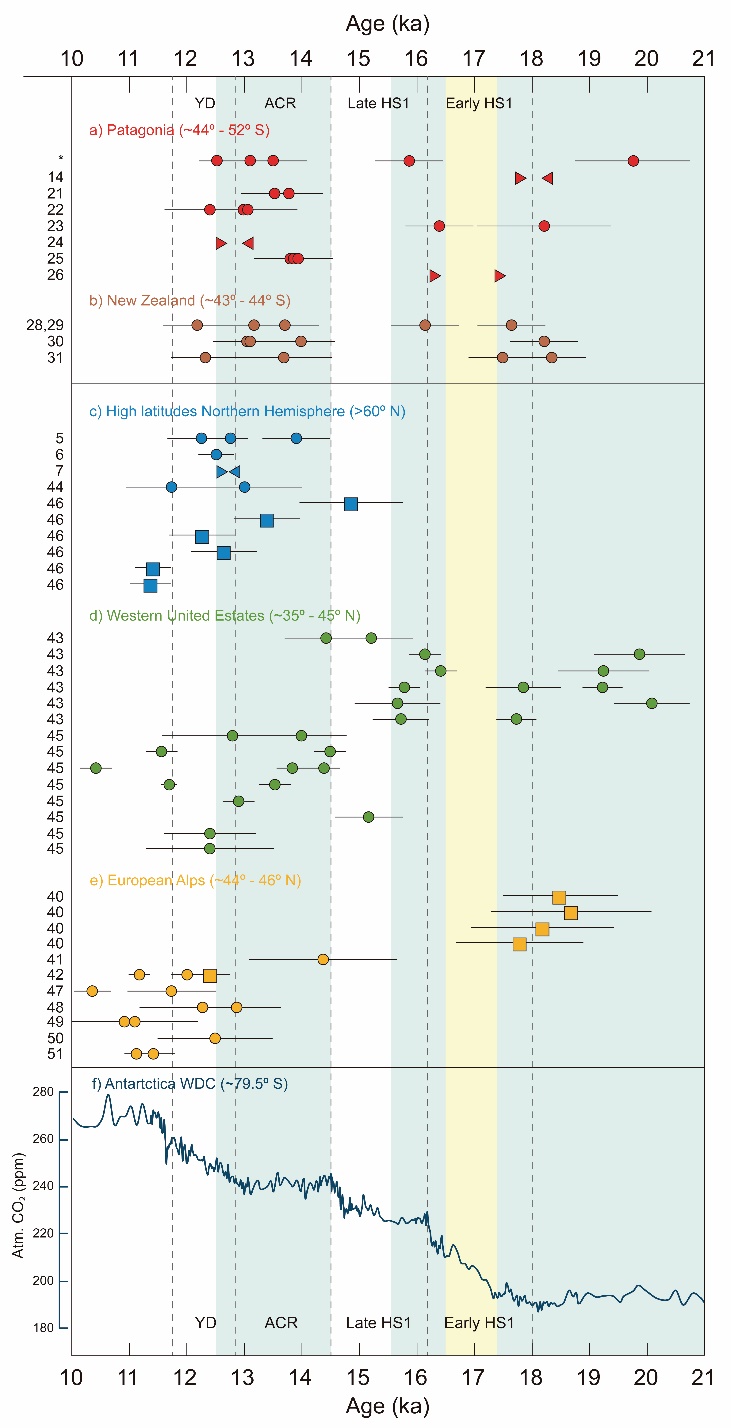

Supplement: Supplementary file 1 [file f765fa85a573babb7d84b670.docx]
